# Supplementary material for: Effect of inositol on the thermally induced crystallization and phase evolution of amorphous calcium phosphate
Source: Royal Society of Chemistry journal article supplement (doi:10.1039/d2ce01078j), 2022-01-01
Supplement: d2ce01078j1.pdf [file d2ce01078j1.pdf]

**Effect of inositol on the thermally induced crystallization and phase  
evolution of amorphous calcium phosphate**

Lu Wang, Jianqiang Bi \*, Kangning Sun \*, Aimin Li, Yuan Zhen, Fushuai Yang and  
Junjie Mao

Key Laboratory for Liquid-Solid Structural Evolution and Processing of Materials,  
Ministry of Education, School of Materials Science & Engineering, Shandong  
University, Jinan 250061, China

\*Corresponding author

Tel: +86-531-88396179(J. Bi); +86-531-88392439(K. Sun)

E-mail address: bj1969@163.com (J. Bi); sunkangning@sdu.edu.cn (K. Sun)

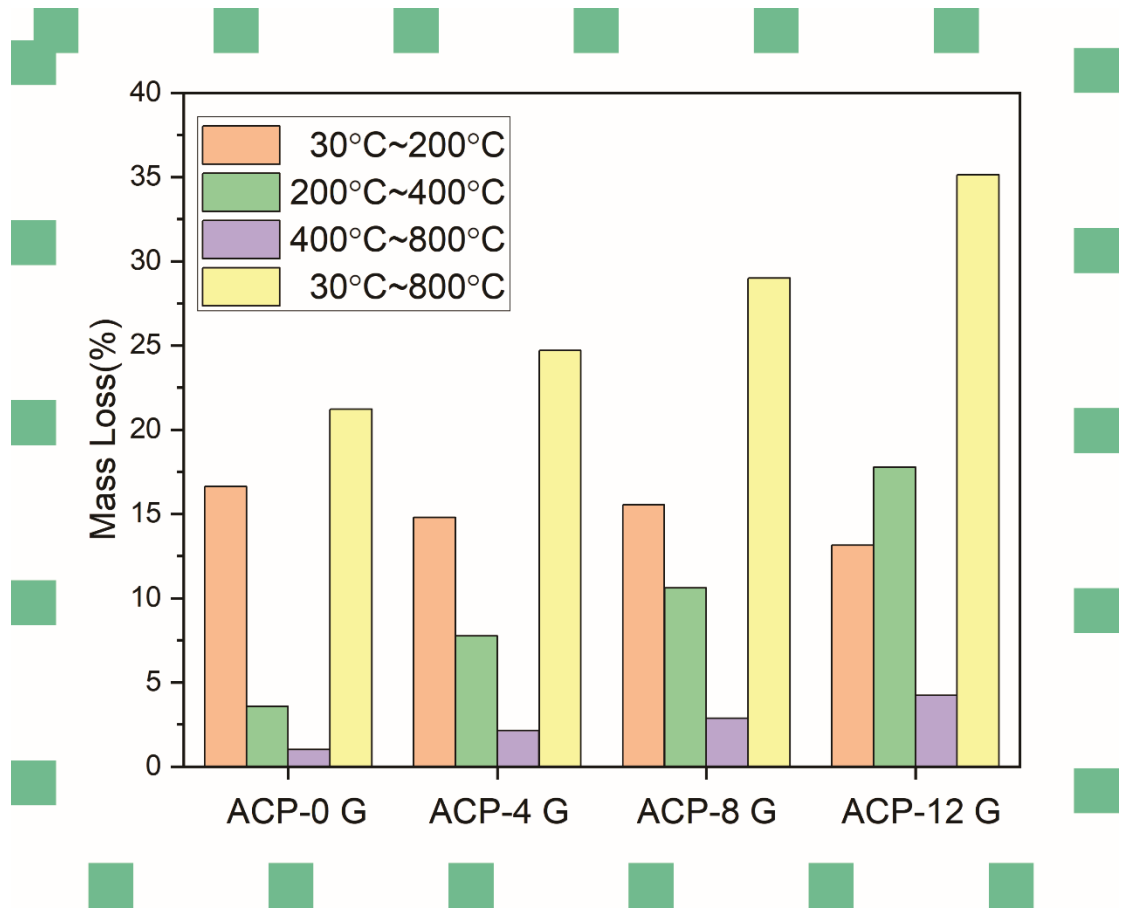

Fig. S 1 TG results of Sample ACPs

(a)

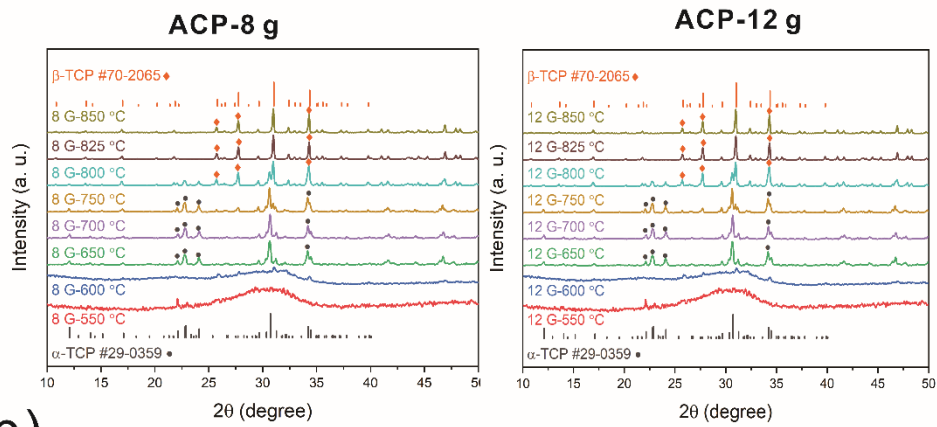

(b)

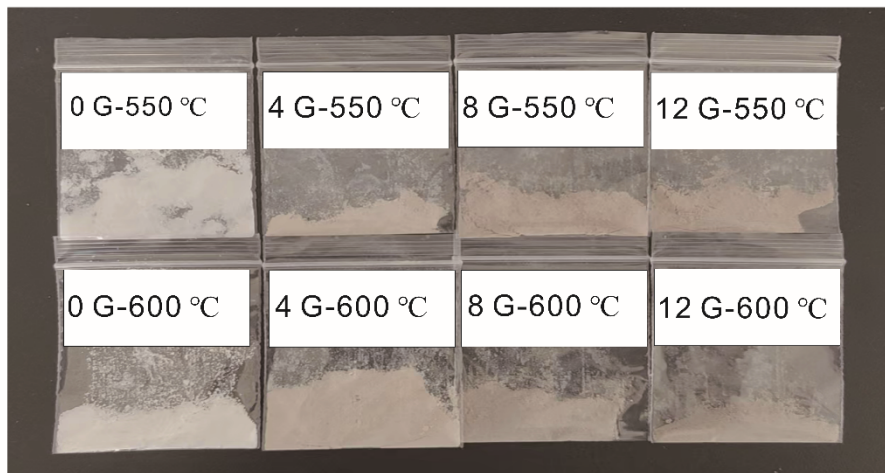

Fig. S2 a): XRD patterns of Sample ACP-8 G and ACP-12 G series annealed under different temperature(550 °C~850 °C); b): Photos of Sample 550 °C and 600 °C series;

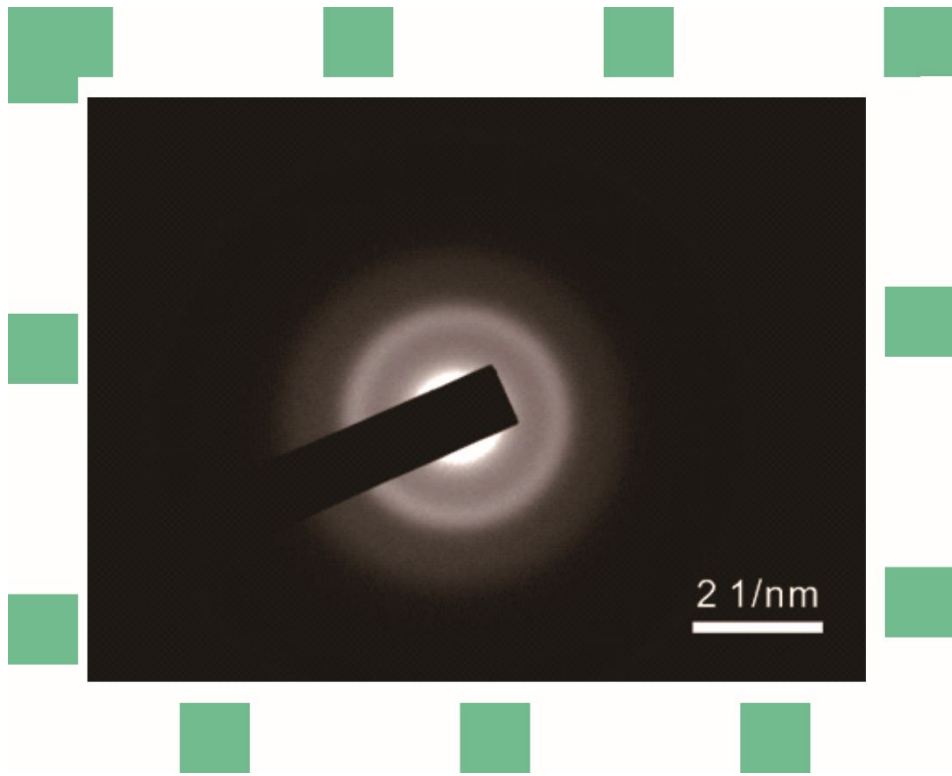

Fig. S3 SAED image of Sample ACP-0 G.(The images of Samples ACP-4 G, ACP-8 G, ACP-12 G showed no obvious difference).
